# Supplementary material for: Visible-light-driven CO2 reduction on a hybrid photocatalyst consisting of a Ru(ii) binuclear complex and a Ag-loaded TaON in aqueous solutions
Source: Royal Society of Chemistry journal article supplement (doi:10.1039/c6sc00586a), 2016-01-01
Supplement: c6sc00586a1.pdf [file c6sc00586a1.pdf]

# Visible-Light-Driven CO<sub>2</sub> Reduction on a Hybrid Photocatalyst Consisting of a Ru(II) Binuclear Complex and a Ag-Loaded TaON in Aqueous Solutions

*Akinobu Nakada, Takuya Nakashima, Keita Sekizawa, Kazuhiko Maeda and Osamu Ishitani\**

Department of Chemistry, Graduate School of Science and Engineering, Tokyo Institute of  
Technology, 2-12-1-NE-1 O-okayama, Meguro-ku, Tokyo 152-8550, Japan.

## Supporting Information

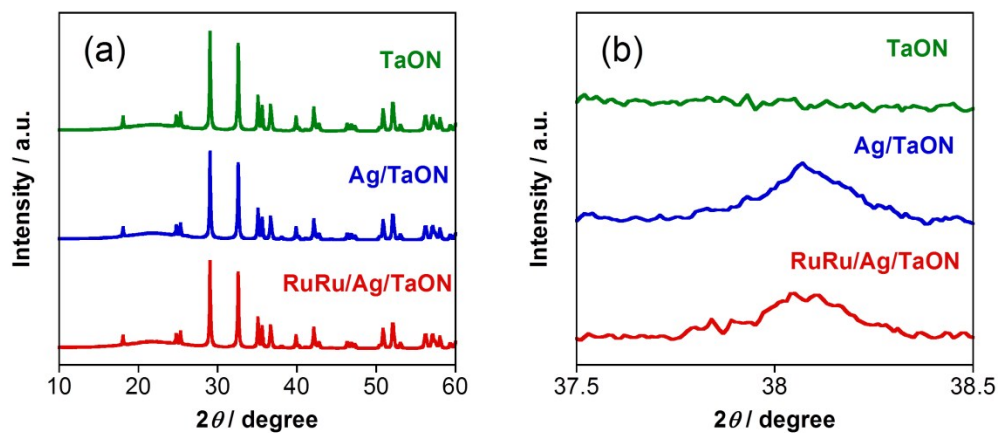

**Fig. S1** (a) XRD patterns of **RuRu/Ag/TaON** (red), **Ag/TaON** (blue), and **TaON** (green). (b) Enlarged patterns of (a).

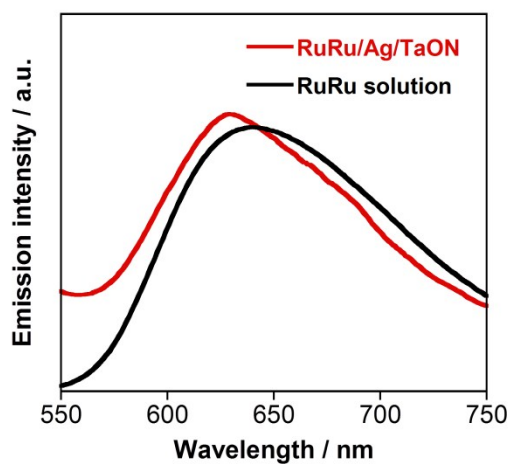

**Fig. S2** Emission spectra of **RuRu/Ag/TaON** and **RuRu** in water.

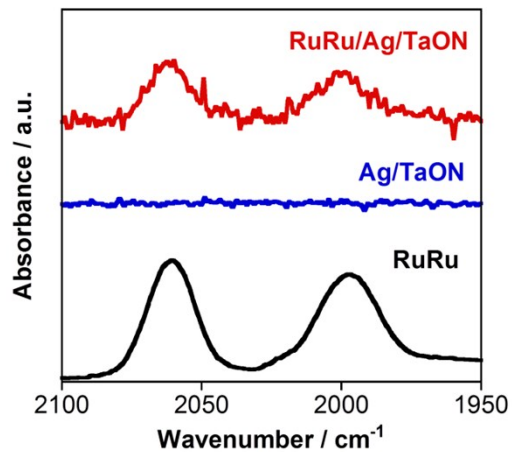

**Fig. S3** FT-IR spectra of **RuRu/Ag/TaON** (red), **Ag/TaON** (blue), and **RuRu** (black) in KBr pallets.

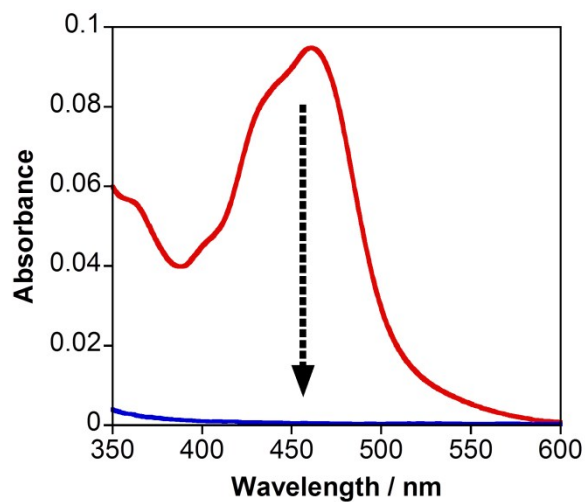

**Fig. S4** UV-vis absorption spectra of **RuRu** solution in acetonitrile before (red) and after (blue) soaking with **Ag/TaON**.

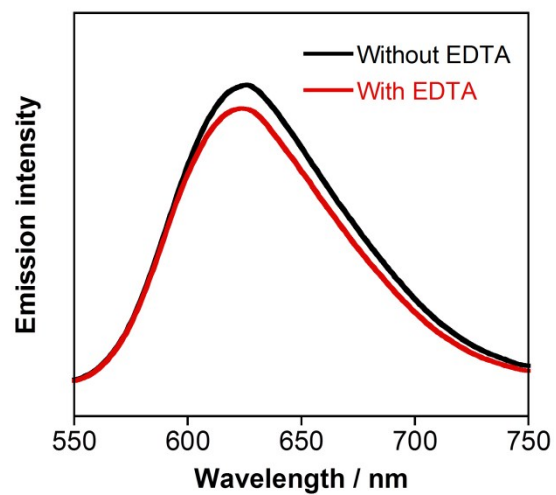

**Fig. S5** Emission spectra of **RuRu** adsorbed on Al<sub>2</sub>O<sub>3</sub> (4 mg) in aqueous solution (4 mL) without (black) and with (red) EDTA·2Na (10 mM). The excited wavelength was 444.

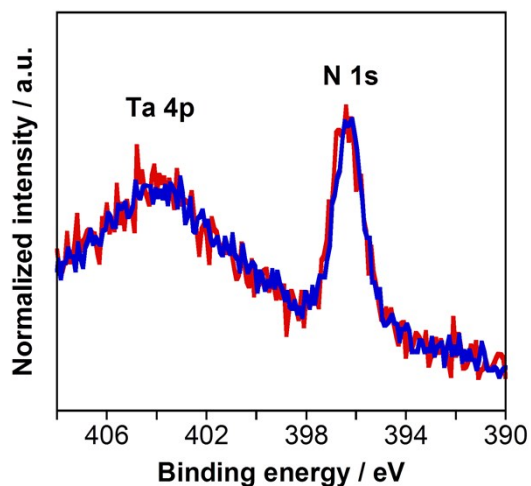

**Fig. S6** XPS spectra for Ta 4p and N 1s of **RuRu/Ag/TaON** normalized by the peak area for Ta 4f before (red) and after (blue) photocatalytic reaction corresponding to Table 1, entry 1.

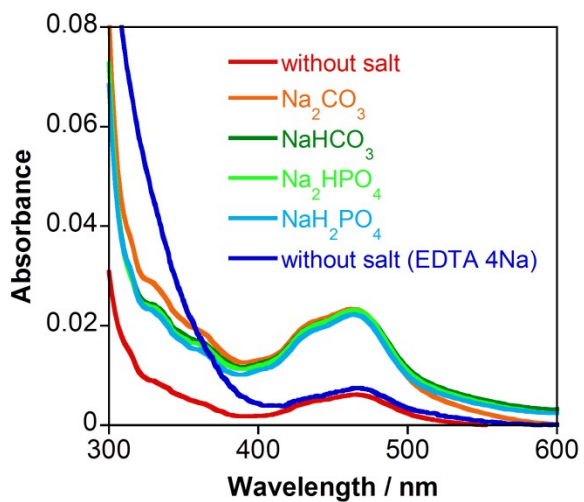

**Fig. S7** UV-vis absorption spectra after photocatalytic reaction corresponding to Table 2 entry 1-4, 6, and 11.

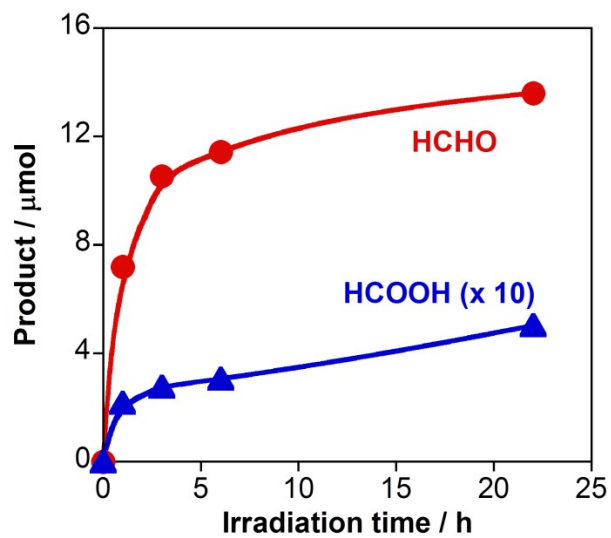

**Fig. S8** Time-dependent produced amounts of HCHO (red) and HCOOH (blue) via photocatalytic MeOH oxidation over TaON (4mg) in AgNO<sub>3</sub> (10 mM) aqueous solution (4 mL) with a visible-light ( $\lambda > 400$  nm) irradiation under an Ar atmosphere.
